# Supplementary material for: Pd2L2 metallacycles as molecular containers for small molecules
Source: Royal Society of Chemistry journal article supplement (doi:10.1039/c0dt00406e), 2010-01-01
Supplement: c0dt00406e.pdf [file c0dt00406e.pdf]

## Supporting Information

*for*

### **Pd<sub>2</sub>L<sub>2</sub> metallacycles as molecular container for small molecules**

Qian Zhang, Lisi He, Jun-Min Liu, Wei Wang, Jianyong Zhang, and Cheng-Yong Su

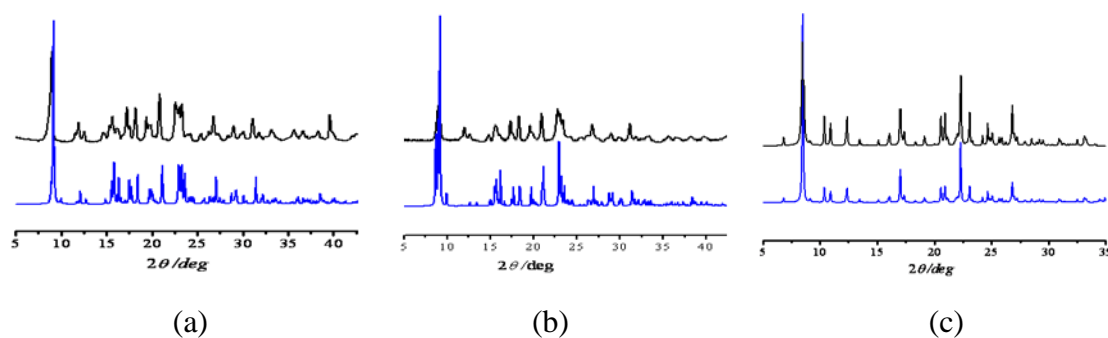

**Figure S1.** The simulated X-ray powder diffraction patterns (lower) and the measured ones (upper) for: (a) **1**, (b) **2** and (c) **5**.

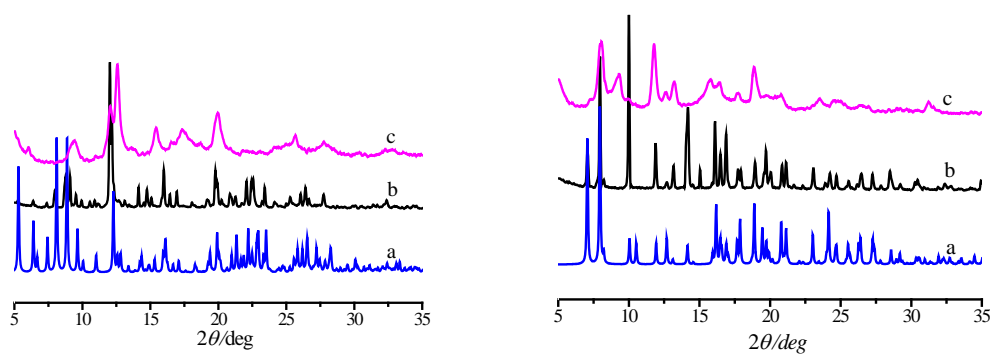

**Figure S2.** The simulated X-ray powder diffraction patterns and the measured ones for **3** (left) and **4** (right): (a) simulated pattern, (b) measured for the freshly synthesized crystals, and (c) measured for the grinded crystals or long air exposed crystals.

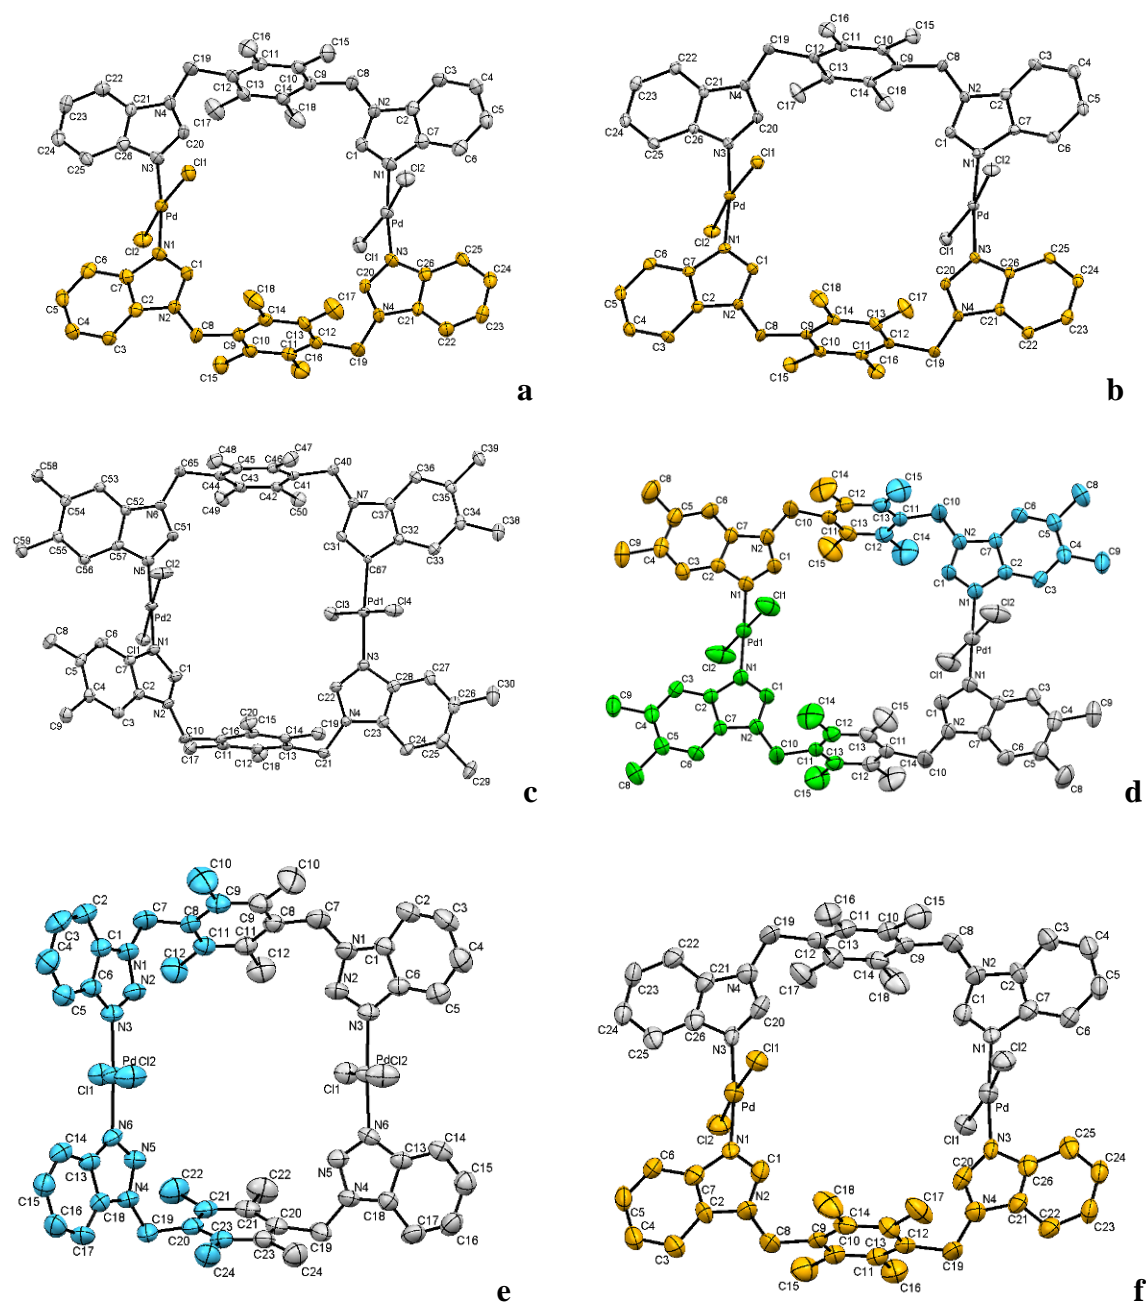

**Figure S3** Ortep view of crystal structures showing atomic labeling scheme and asymmetric unit differentiated by colors: (a) **1**, (b) **2**, (c) **3**, (d) **4**, (e) **5** and (f) **1'**. H atoms and solvated molecules are omitted for clarity.

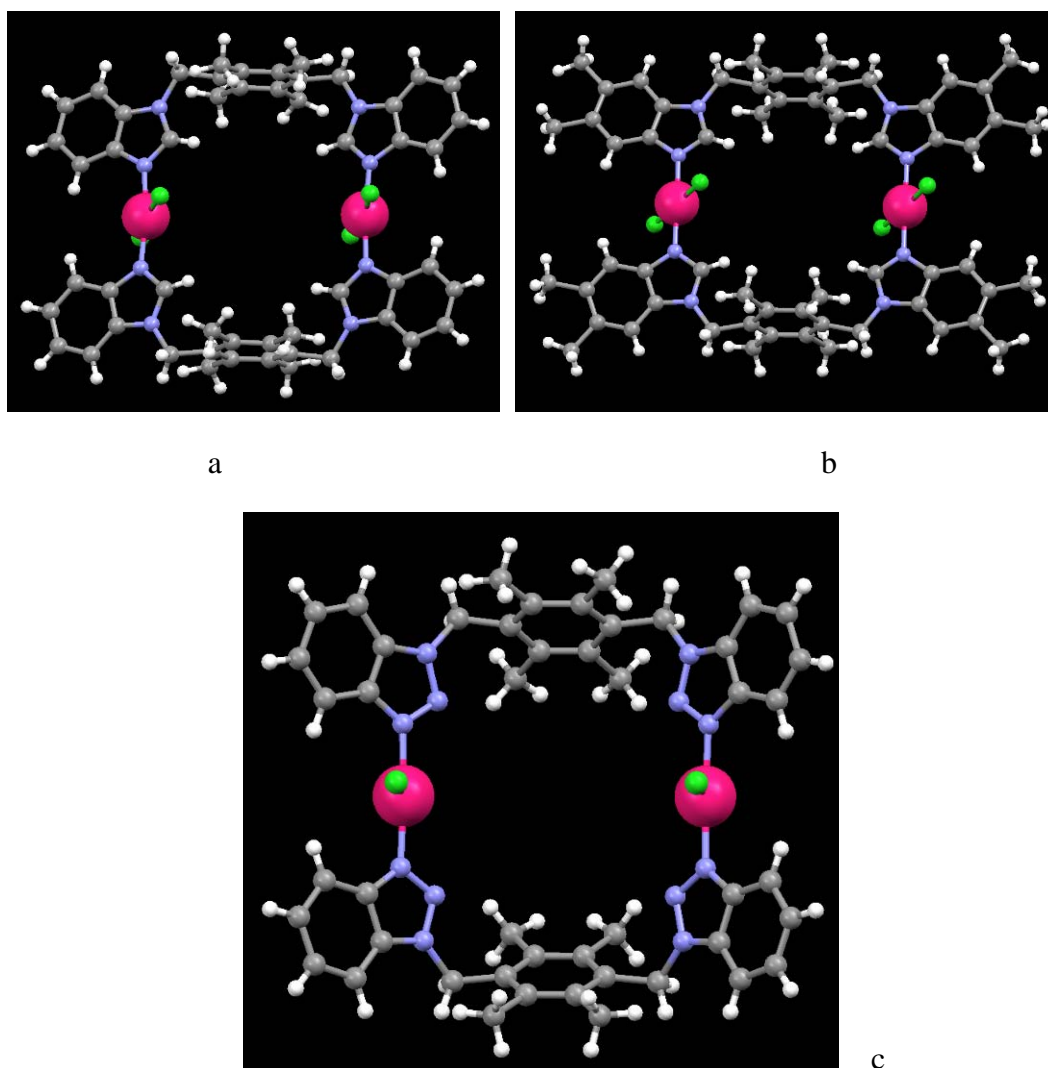

**Figure S4** Crystal structures showing orientation relationship between the benzimidazole rings and the bridging phenyl ring in **1** (a) and **4** (b), and between the benzotriazole rings and the bridging phenyl ring in **5** (c).

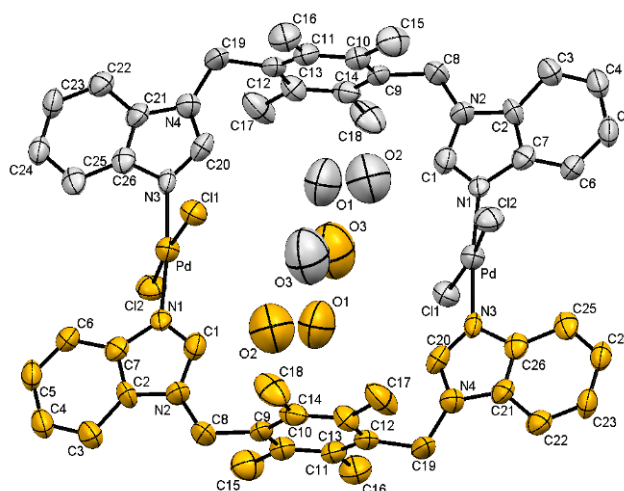

**Figure S5** Crystal structure of **1a** showing rectangular box where water molecules are located. The asymmetric units are differentiated by colors

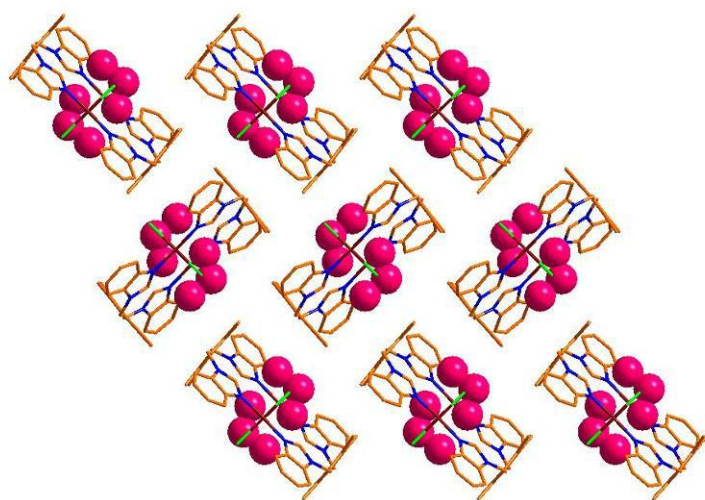

**Figure S6.** Crystal packing viewed along *c*-axis for **1**.

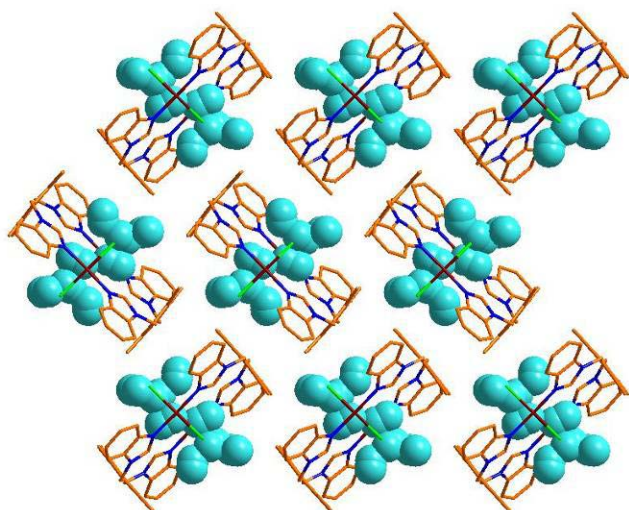

**Figure S7.** Crystal packing viewed along *c*-axis for **2**.

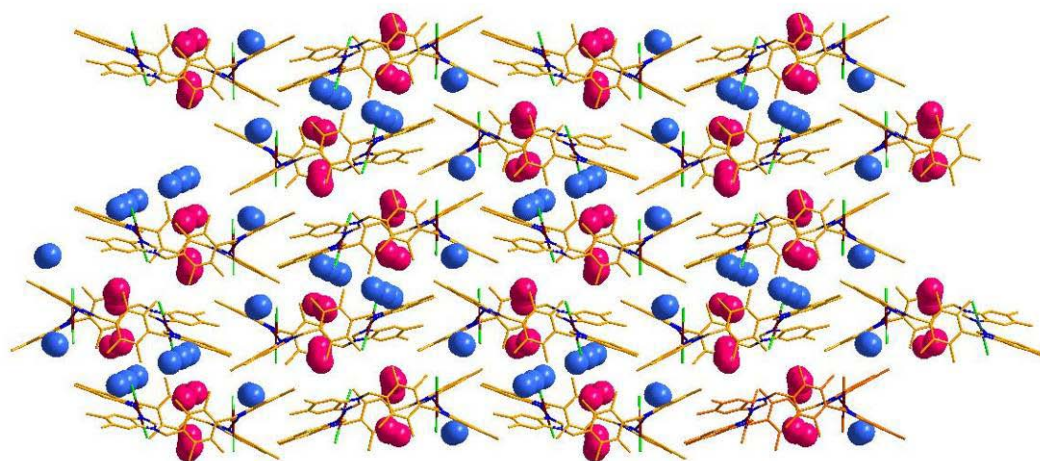

**Figure S8.** Crystal packing viewed along *a*-axis for **3**.

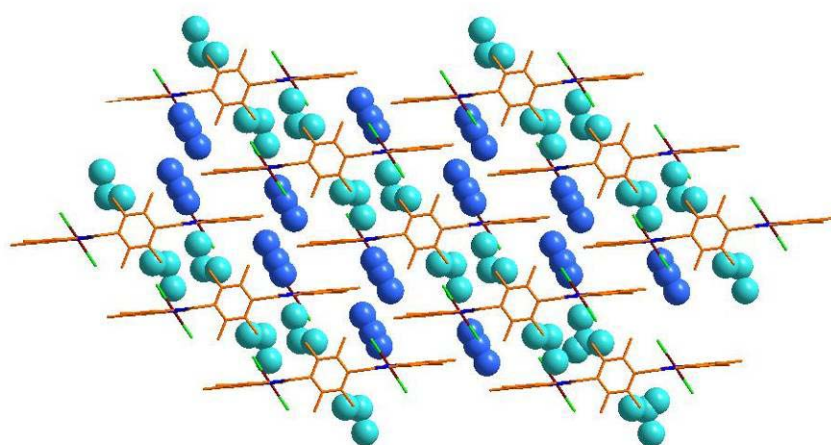

a

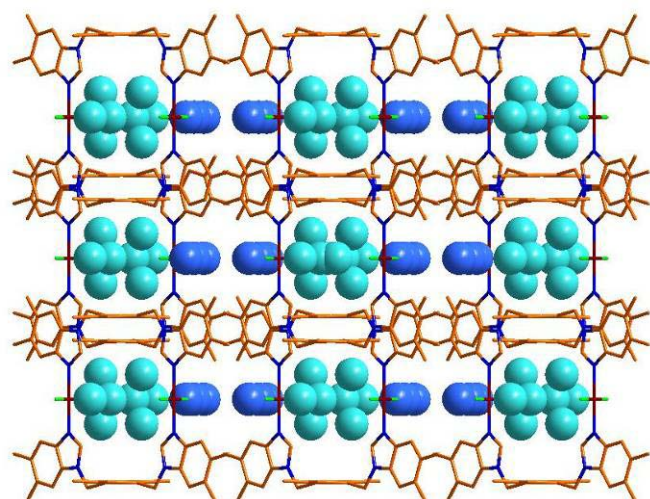

b

**Figure S9.** Crystal packing viewed along *b*-axis (a) and *a*-axis (b) for **4**.

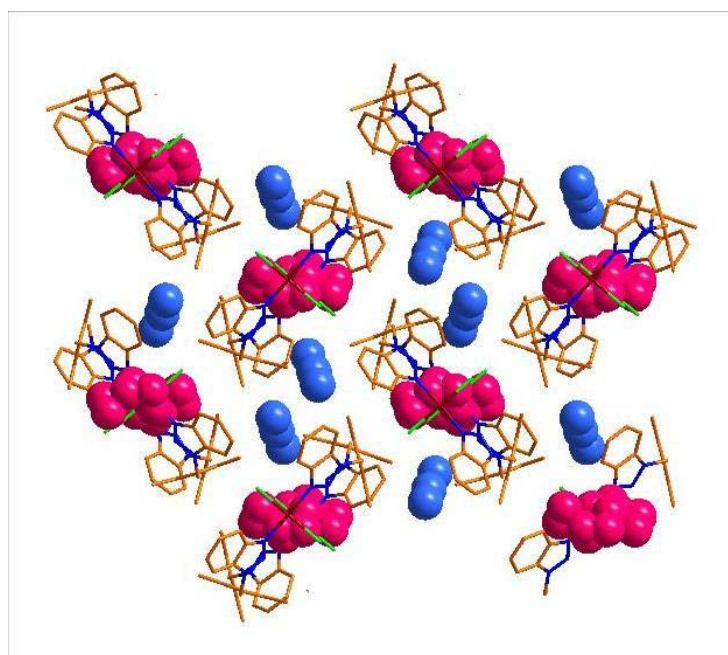

**Figure S10.** Crystal packing viewed along *b*-axis for **5**.

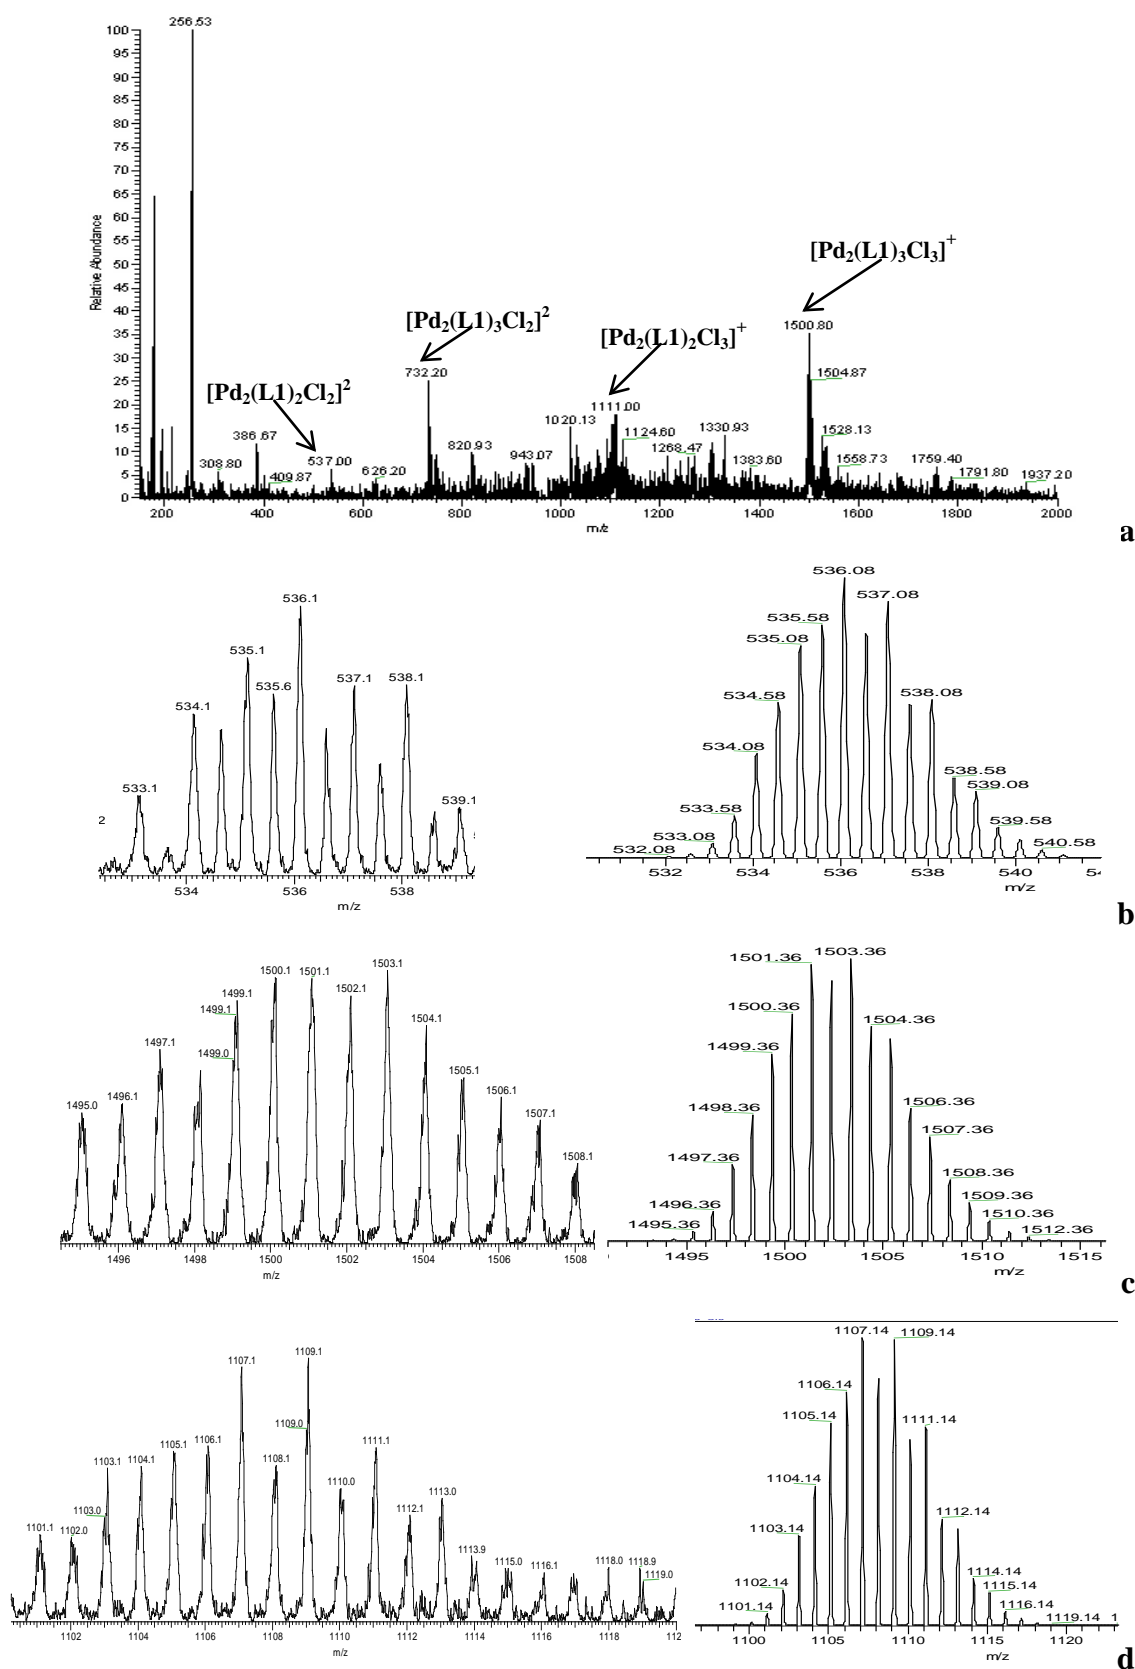

**Figure S11.** ESI-MS spectrum of **1** (a) and isotopic distributions of selected peaks shown together with simulations for  $[\text{Pd}_2(\text{L}1)_2\text{Cl}_2]^{2+}$  (b),  $[\text{Pd}_2(\text{L}1)_3\text{Cl}_3]^+$  (c) and  $[\text{Pd}_2(\text{L}1)_2\text{Cl}_3]^+$  (d).

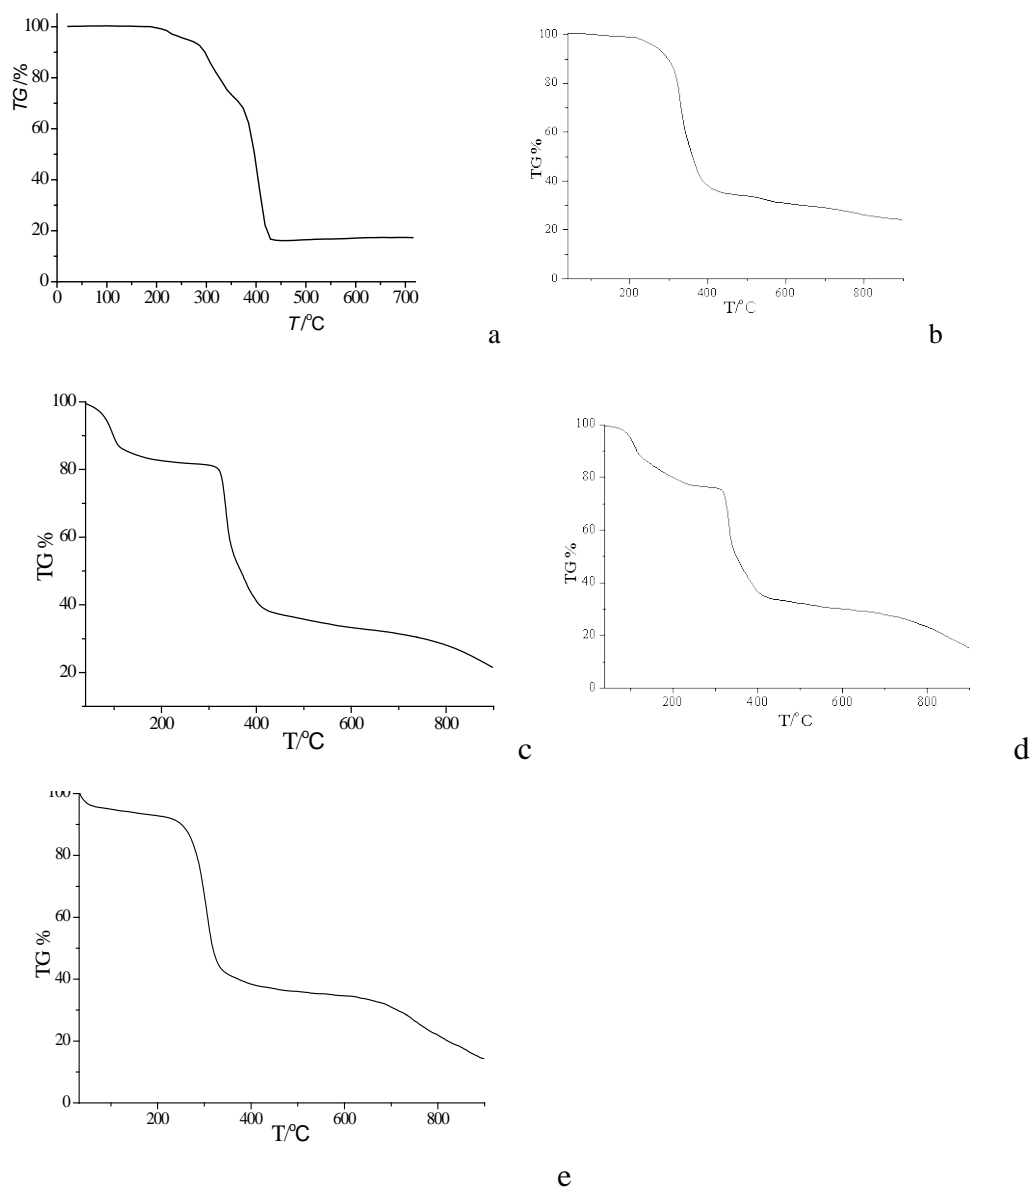

**Figure S12.** TG curves for a) **1**, b) **2**, c) **3**, d) **4** and e) **5**.

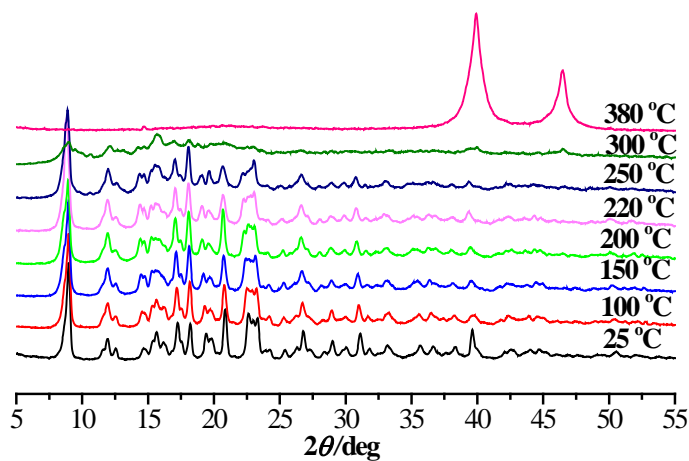

**Figure S13.** Variable-temperature PXRD spectra of **1**.
